# Supplementary material
Source: PubMed Central journal article supplement (PMC9482022)
Supplement: mmc1.pdf [file mmc1.pdf]

**YMTHE, Volume 30**

## **Supplemental Information**

### **Macrophages as a therapeutic target to promote diabetic wound healing**

**Maryam Sharifiaghdam, Elnaz Shaabani, Reza Faridi-Majidi, Stefaan C. De Smedt, Kevin Braeckmans, and Juan C. Fraire**

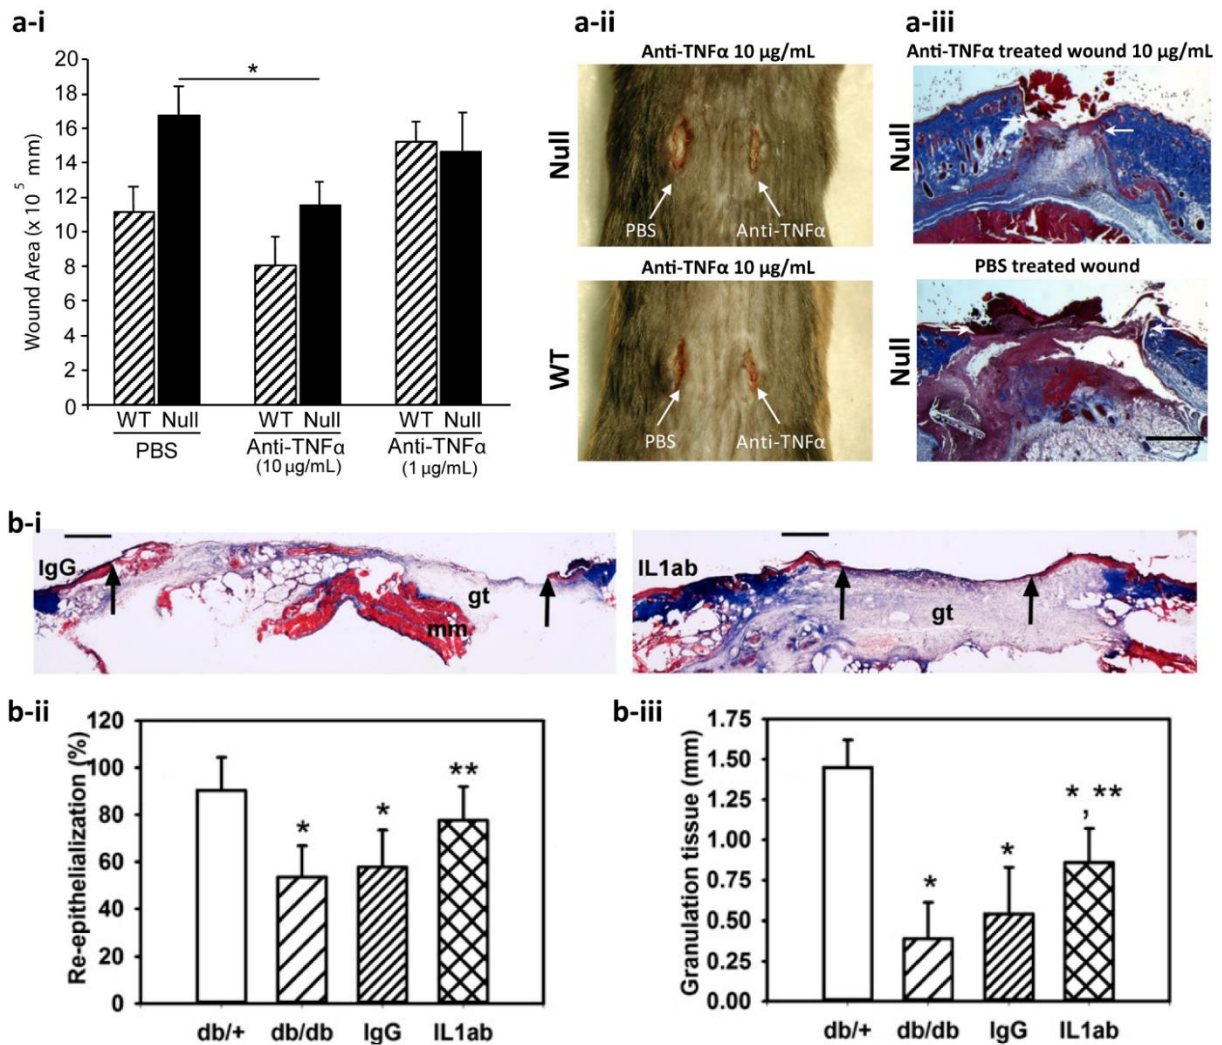

**Figure S1. Inhibition of effects induced by inflammatory M1-like macrophages in the wound bed. (a)** Accelerated wound healing by neutralization of tumor necrosis factor alpha (TNF $\alpha$ ) in an SLPI null mice model, lacking anti-inflammatory and anti-proteolytic activity. i) Single administration of Anti-TNF $\alpha$  antibodies (10 $\mu$ g/mL) at the time of wounding significantly reduces cross-sectional wound areas compared to control (PBS treated) wounds at day 3 post-wounding. Data represent mean values and error bars the SEM. \* $p < 0.05$ .  $n = 6$ . null: secretory leukocyte protease inhibitor null mouse, WT: Wild-type. ii) The macroscopic images show accelerated healing after TNF $\alpha$  antibody treatment (Anti-TNF $\alpha$ ) compared to control (PBS). iii) Masson's trichrome staining at day 3 post-wounding illustrates a marked reduction of wound size after treatment with anti-TNF $\alpha$  antibodies (10  $\mu$ g/mL) compared to the PBS treated group. Arrows demarcate wound margins. Scale bar = 300  $\mu$ m. Adopted from Ashcroft, G. S. et al.<sup>1</sup> Copyright (2011), with permission from Wiley. **(b)** Accelerated wound healing by Interleukin-1 beta (IL-1 $\beta$ ) neutralization in diabetic mice. i) Accelerated re-epithelialization and granulation tissue formation is observed in the group treated by IL-1 $\beta$  antibody (IL1ab) in comparison to IgG-treated mice. Scale bar = 0.5 mm. Arrows indicate the ends of migrating epithelial tongues. gt, granulation tissue; mm, deep muscle. ii) Quantification of re-epithelialization and iii) granulation tissue thickness of wounds in nondiabetic mice (db/+), untreated diabetic mice (db/db), IgG-treated diabetic mice (IgG), and IL1ab-treated diabetic mice (IL1ab), on day 10 postinjury. Adopted from Mirza, R. E. et al.<sup>2</sup>

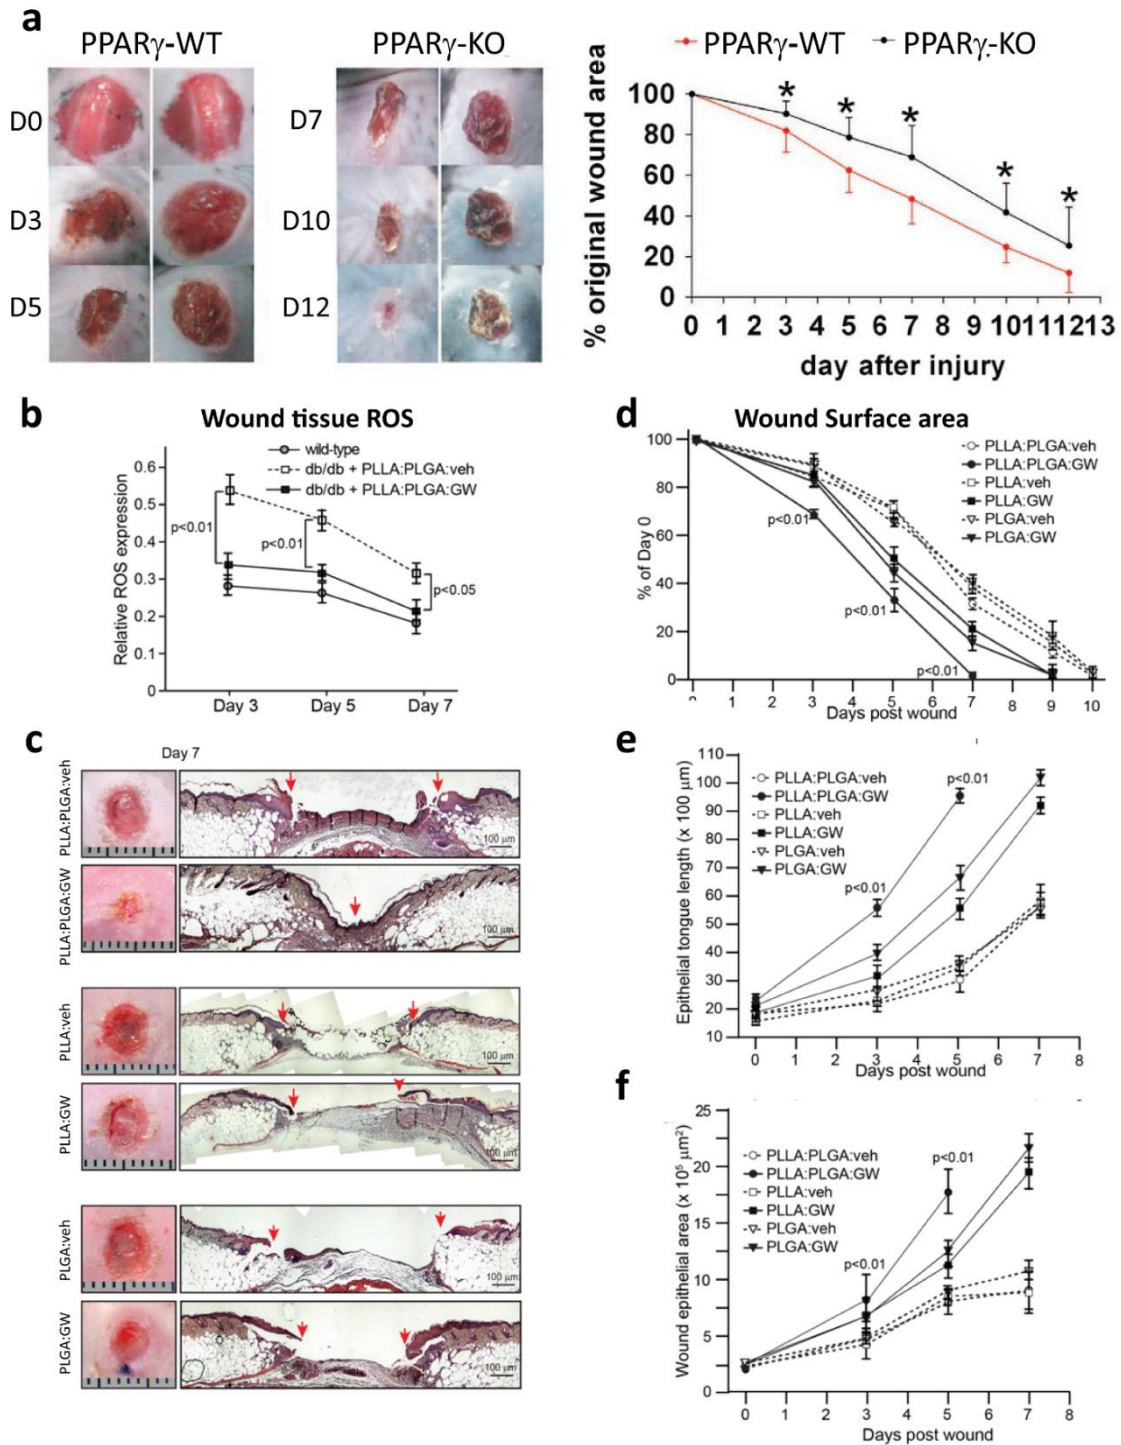

**Figure S2. Diabetic wound interventions by application of peroxisome proliferator-activated receptors (PPARs) agonist.** (a) Representative macroscopic images and statistical analysis of delayed wound healing in PPAR $\gamma$ -knock out (KO) mice versus PPAR $\gamma$ -wild type (WT) mice. Adapted from Chen, H. et al.<sup>3</sup> (b) Relative ROS levels of wounds treated with PPAR $\beta/\delta$  agonist GW501516 (GW) encapsulated in core-shell of Poly(L-lactide) and poly(D,L-lactide-co-glycolide) (PLLA:PLGA:GW) microparticles, and vehicle control microparticles without encapsulated GW (PLLA:PLGA:veh). (c) Representative macroscopic images (left) and H&E (right) sections of diabetic wounds (day 7) treated with PLLA:PLGA:veh, PLLA:PLGA:GW, PLLA:veh, PLLA:GW and PLGA:veh, PLGA:GW. Ruler units are in mm and red arrows show the epithelial wound edge. (d) statistical analysis of wound surface area expressed as percentage of the initial (day 0) wound size. Wound epithelial tongue length (e) and epithelial area (f) determined by histomorphometric analyses of wound biopsies treated with PLLA:PLGA:veh, PLLA:PLGA:GW, PLLA:veh, PLLA:GW and PLGA:veh, PLGA:GW at day 7 post-wounding. Data shown are mean values  $\pm$  SD, P values are based on

comparisons between PLLA:PLGA:GW treatment and control PLLA:PLGA:veh. Reprinted from Wang, X. et al.<sup>4</sup> Copyright (2015), with permission from Elsevier.

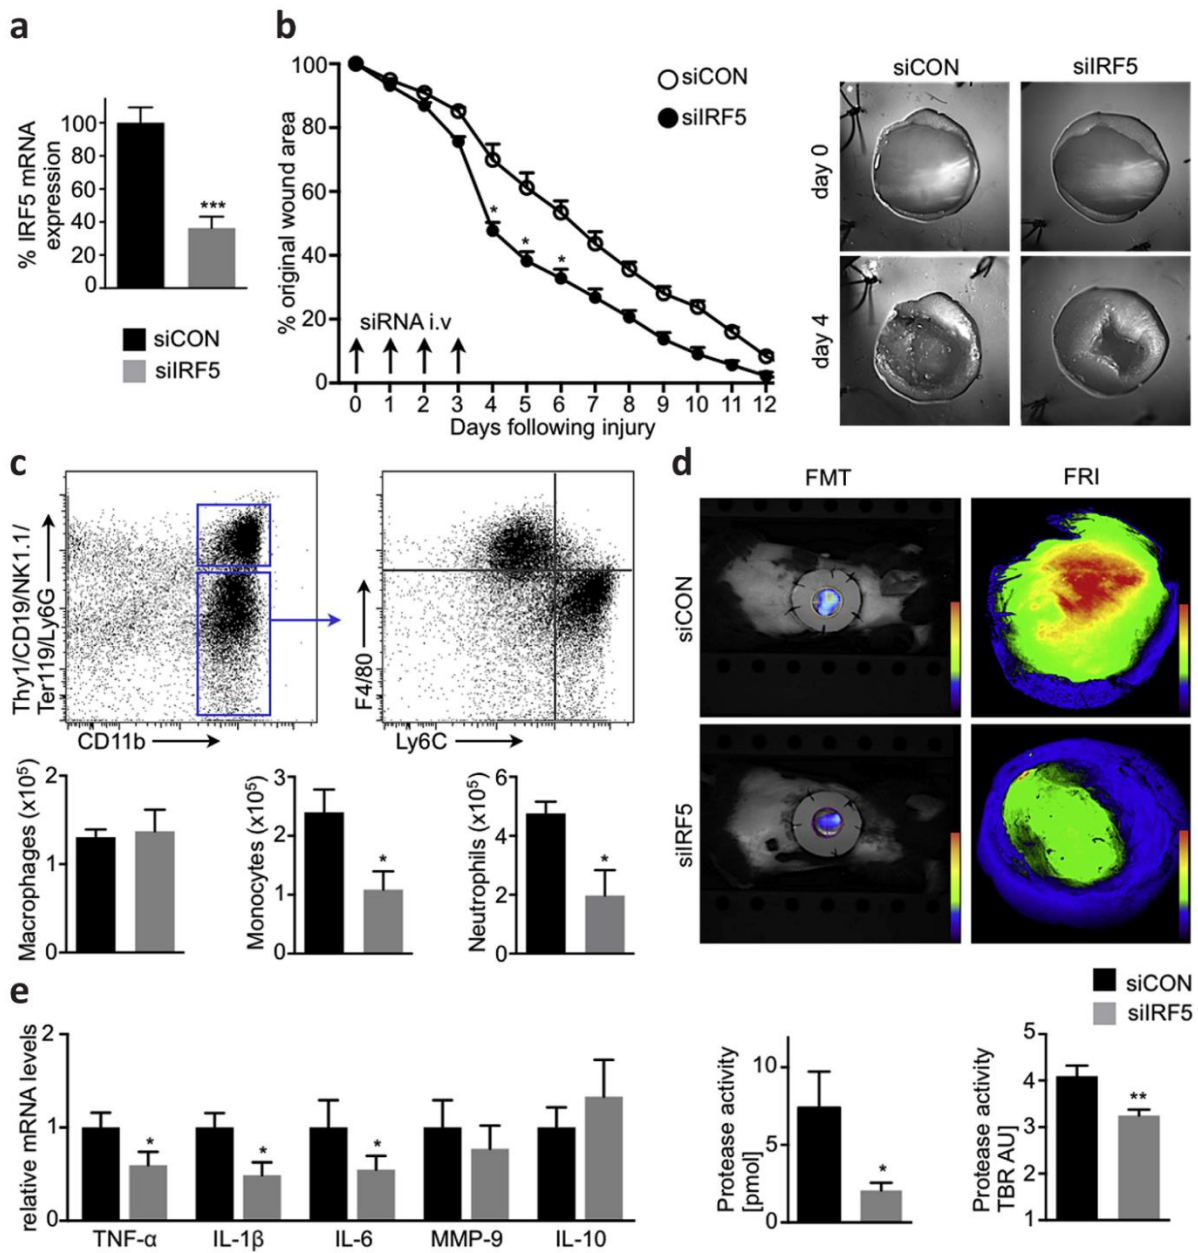

**Figure S3. The effect of IRF5 silencing in skin wound healing.** (a) IRF5 silencing in monocytes/macrophages isolated from excisional wounds of mice injected 4 days after wounding with siIRF5 or siCON (0.5 mg/kg) (n = 9 per group). (b) Wounds were imaged, and the open wound areas were measured daily in mice injected with siIRF5 and siCON (n = 7 to 8 per group). (c) Flowcytometry graph and analysis of wound leukocyte content on day 4 (n = 5 per group). (d) Wound protease activity on day 4, in mice treated i.v. with siIRF5 or siCON (0.5 mg/kg) by fluorescence molecular tomography-computed tomography (FMT-CT) and FRI (fluorescence reflectance imaging) (n = 8 per group) (e) Expression level of M1 and M2 mRNA in wound macrophages on day 4 (n = 10 to 12 per group). \*p < 0.05. \*\*p < 0.01. \*\*\*p < 0.001. Reprinted from ourties, G. et al.<sup>5</sup> Copyright (2014), with permission from Elsevier.



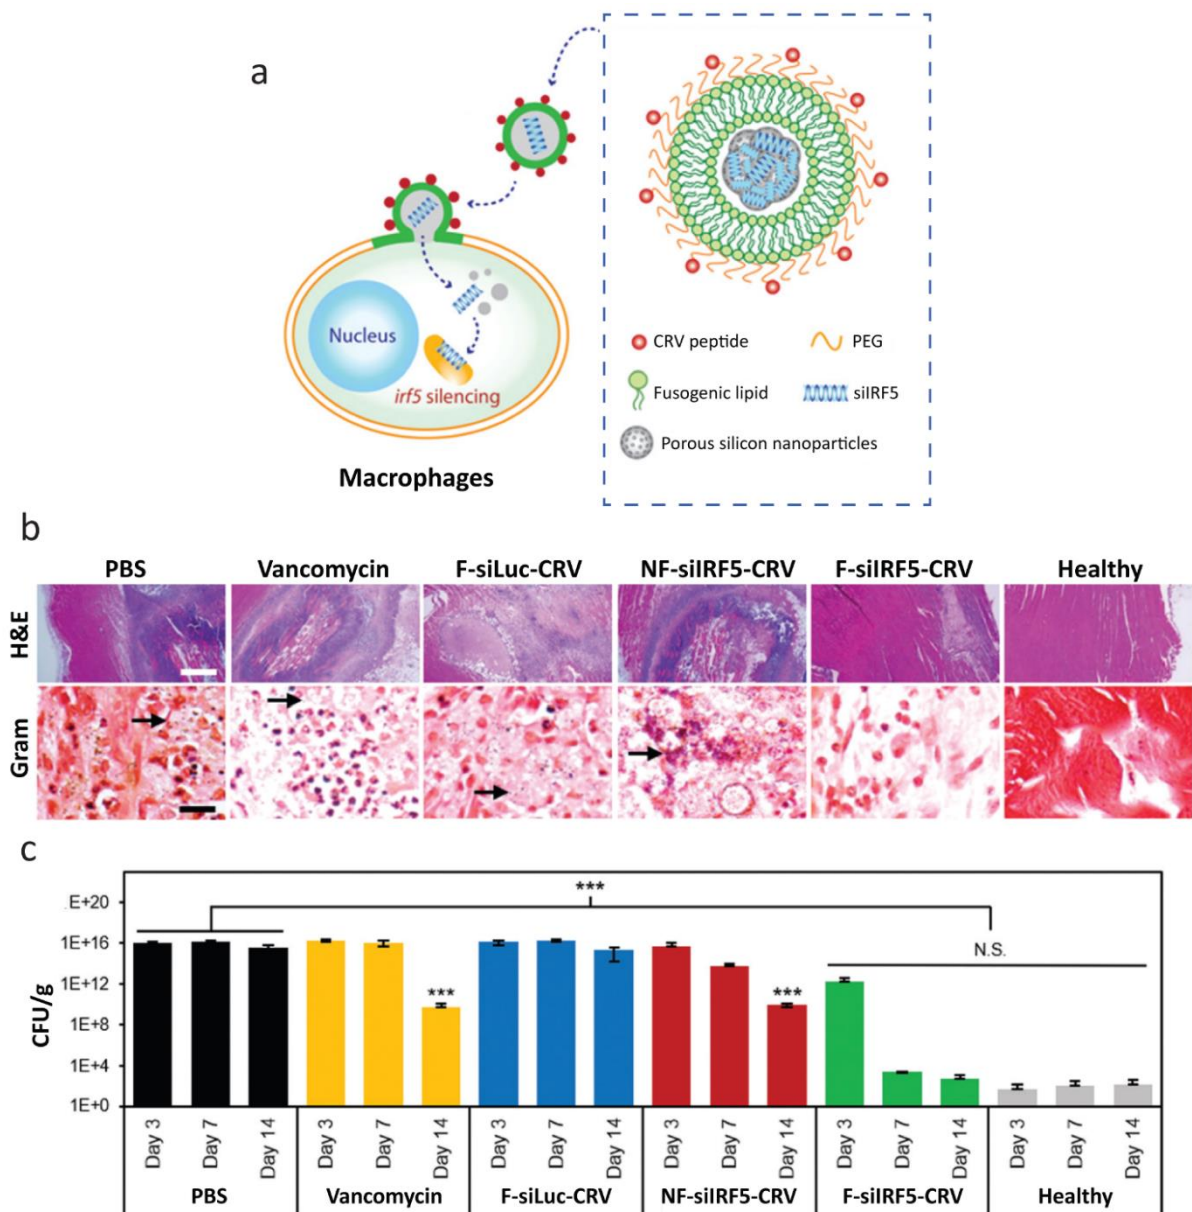

**Figure S4. *In vivo* therapeutic efficacy of siRF5 in MRSA muscle infection.** (a) Schematic figure depicting the CRV peptide-targeted, fusogenic porous silicon nanoparticles (F-pSiNPs-CRV) for delivering and silencing the IRF5 gene in macrophages. (b) Stained infected muscle tissues (H&E and Gram) 7 days after treatment with different groups including: PBS, vancomycin, non-fusogenic, targeted pSiNPs containing siRF5 (NF-siIRF5-CRV), fusogenic, CRV-targeted pSiNPs containing siRNA against luciferase, as a negative control for siRF5 (F-siLuc-CRV), and fusogenic, CRV-targeted pSiNPs containing siRF5 (F-siIRF5-CRV); scale bar represents 1 mm (top row) and 100 mm (bottom row); (c) Bacterial titer counts (CFU per mass of tissue) at days 3, 7, and 14 post-intravenous injection in healthy and methicillin-resistant *Staphylococcus aureus* (MRSA)-infected mice. Mice were infected on day 0 and injections were given on day 1. Bars indicate standard deviation with  $n = 6$ . N.S. represents no significance and \*\*\* represents  $p < 0.01$  relative to the PBS group from one-way ANOVA with Tukey's HSD post hoc analyses. Reproduced from Ref.<sup>6</sup>, with permission from the Royal Society of Chemistry.

## References

- 1 Ashcroft, G. S. *et al.* Tumor necrosis factor-alpha (TNF- $\alpha$ ) is a therapeutic target for impaired cutaneous wound healing. *Wound Repair and Regeneration* **20**, 38-49 (2012).
- 2 Mirza, R. E., Fang, M. M., Ennis, W. J. & Koh, T. J. Blocking interleukin-1 $\beta$  induces a healing-associated wound macrophage phenotype and improves healing in type 2 diabetes. *Diabetes* **62**, 2579-2587 (2013).
- 3 Chen, H. *et al.* Macrophage peroxisome proliferator-activated receptor  $\gamma$  deficiency delays skin wound healing through impairing apoptotic cell clearance in mice. *Cell death & disease* **6**, e1597-e1597 (2015).
- 4 Wang, X. *et al.* Early controlled release of peroxisome proliferator-activated receptor  $\beta/\delta$  agonist GW501516 improves diabetic wound healing through redox modulation of wound microenvironment. *Journal of controlled release* **197**, 138-147 (2015).
- 5 Courties, G. *et al.* In vivo silencing of the transcription factor IRF5 reprograms the macrophage phenotype and improves infarct healing. *Journal of the American College of Cardiology* **63**, 1556-1566 (2014).
- 6 Kim, B. *et al.* Fusogenic porous silicon nanoparticles as a broad-spectrum immunotherapy against bacterial infections. *Nanoscale horizons* **6**, 330-340 (2021).
